# Supplementary material
Source: PubMed Central journal article supplement (PMC3944900)
Supplement: NIHMS548313-supplement-01.pdf [file NIHMS548313-supplement-01.pdf]

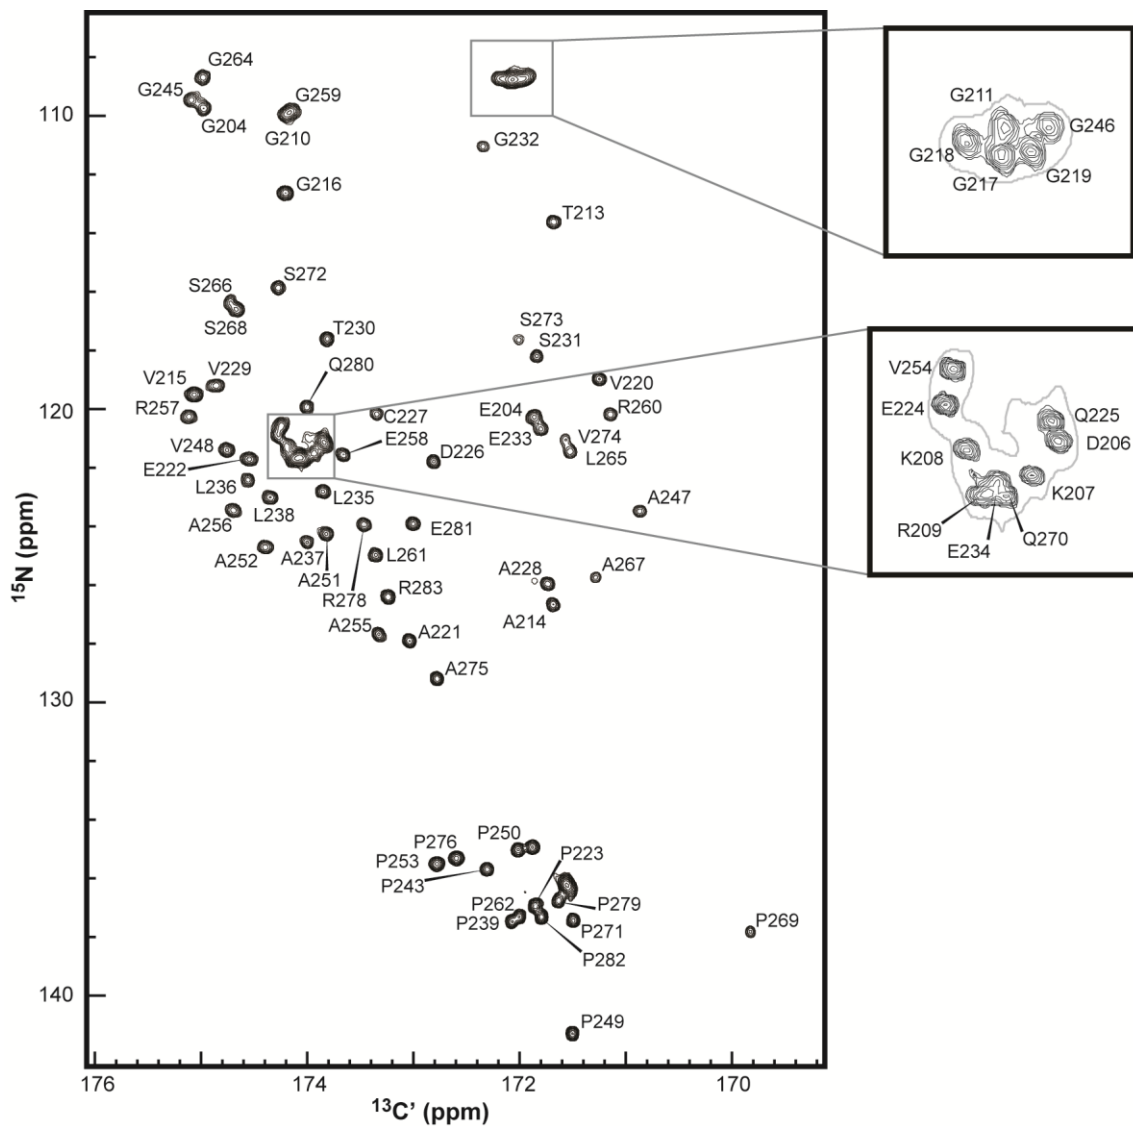

**Figure S1.** Chemical shift assignments of Pdx1 c-terminus IDP annotated on a 2D-heteronuclear correlation spectra using the newer  $\text{H}_\alpha$ - start  $^{13}\text{C}$ -detected CON as described in Figure 2B. The zoom of the region with the high concentrations of NMR peaks are shown on the right with high resolution  $\text{H}_\text{N}$ - start  $^{13}\text{C}$ -detected CON as described in Figure 2A.

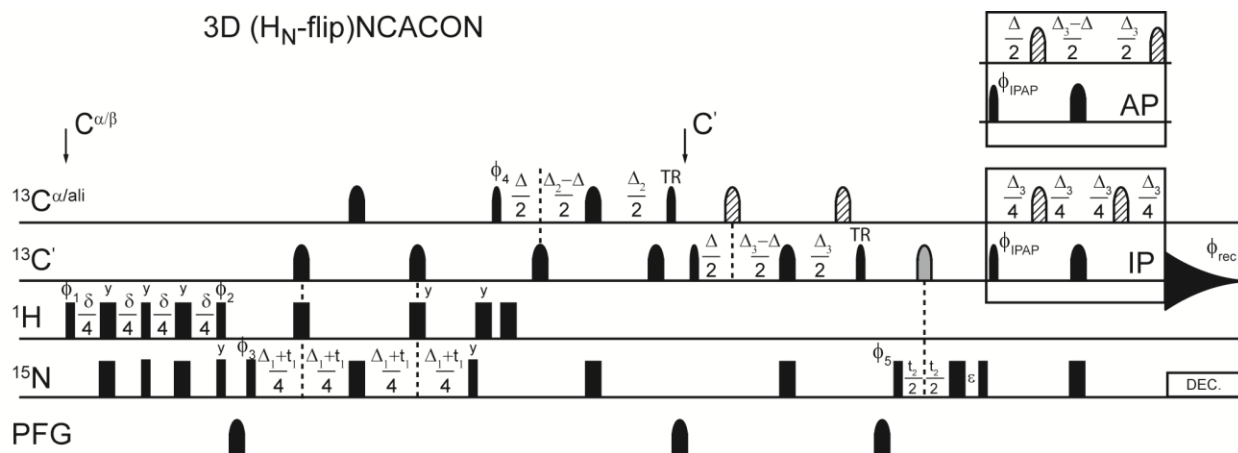

**Figure S2.** Pulse sequence for the ( $H_N$ -flip)NCACON-IPAP experiment. The delays are  $\delta = 10.8$  ms,  $\Delta = 9.0$  ms,  $\Delta_1 = 24.8$  ms,  $\Delta_2 = 28.0$  ms,  $\Delta_3 = 32.0$  ms, and  $\varepsilon = t_2(0) + pC180$ . Pulses are applied at the frequency indicated on the left of each line, with narrow and wide rectangles or shapes representing  $90^\circ$  and  $180^\circ$  pulses, respectively. The gray pulse on  $^{13}\text{C}$  indicates a band-selective  $^{13}\text{C}'$  and  $^{13}\text{C}^\alpha$  inversion pulse. Pulses filled with diagonal lines are off-resonance  $180^\circ$  Q3 shaped pulses, centered at 54 ppm. Composite pulse decoupling of  $^{15}\text{N}$  was achieved by the use of 1.25 kHz garp- sequences. Pulses labeled 'TR' are time-reversed versions of the standard  $90^\circ$  Q5 shaped pulse. All pulses are applied with x-phase unless otherwise indicated. The phase cycle is  $\varphi_1 = 8(x), 8(-x)$ ;  $\varphi_2 = 8(-x), 8(x)$ ;  $\varphi_3 = x, -x$ ;  $\varphi_4 = 2(x), 2(-x)$ ;  $\varphi_5 = 4(x), 4(-x)$ ;  $\varphi_{\text{IPAP}}(\text{IP}) = x$ ,  $\varphi_{\text{IPAP}}(\text{AP}) = -y$ ;  $\varphi_{\text{REC}} = x, 2(-x), x, -x, 2(x), -x, -x, 2(x), -x, x, 2(-x), x$ . Quadrature detection in the  $t_1$  and  $t_2$  dimension is obtained by States-TPPI incrementation of  $\varphi_3$  and  $\varphi_5$  respectively.

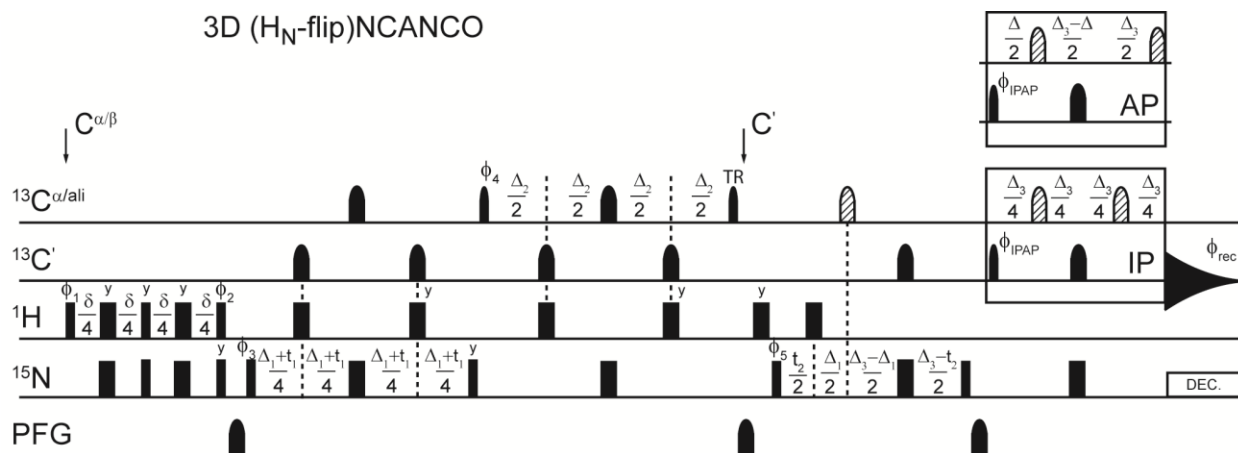

**Figure S3.** Pulse sequence for the ( $H_N$ -flip)NCANCO-IPAP experiment. The delays are  $\delta = 10.8$  ms,  $\Delta = 9.0$  ms,  $\Delta_1 = 24.8$  ms,  $\Delta_2 = 28.0$  ms,  $\Delta_3 = 32.0$  ms, and  $\varepsilon = t_2(0) + pC180$ . Pulses are applied at the frequency indicated on the left of each line, with narrow and wide rectangles or shapes representing  $90^\circ$  and  $180^\circ$  pulses, respectively. The gray pulse on  $^{13}C$  indicates a band-selective  $^{13}C'$  and  $^{13}C^\alpha$  inversion pulse. Composite pulse decoupling of  $^{15}N$  was achieved by the use of 1.25 kHz garp- sequences. Pulses filled with diagonal lines are off-resonance  $180^\circ$  Q3 shaped pulses, centered at 54 ppm. Pulses labeled 'TR' are time-reversed versions of the standard  $90^\circ$  Q5 shaped pulse. All pulses are applied with x-phase unless otherwise indicated. The phase cycle is  $\varphi_1 = 8(x), 8(-x)$ ;  $\varphi_2 = 8(-x), 8(x)$ ;  $\varphi_3 = x, -x$ ;  $\varphi_4 = 2(x), 2(-x)$ ;  $\varphi_5 = 4(x), 4(-x)$ ;  $\varphi_{IPAP}(IP) = x$ ,  $\varphi_{IPAP}(AP) = -y$ ;  $\varphi_{REC} = x, 2(-x), x, -x, 2(x), -x, -x, 2(x), -x, x, 2(-x), x$ . Quadrature detection in the  $t_1$  and  $t_2$  dimension is obtained by States-TPPI incrementation of  $\varphi_3$  and  $\varphi_5$  respectively.

(HACA)NCO-ASP Selective

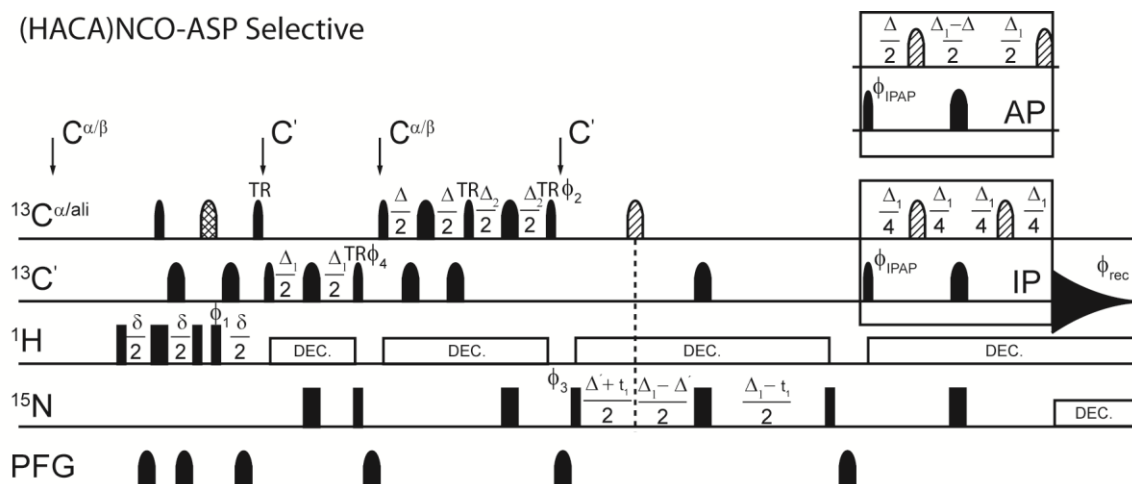

**Figure S4.** Pulse sequence for the (HACA)NCO-D-IPAP experiment. The delays are  $\delta = 8.0$  ms,  $\Delta = 9.0$  ms,  $\Delta_1 = 32$  ms,  $\Delta_2 = 18$  ms, and  $\Delta' = 26.6$  ms. Pulses are applied at the frequency indicated on the left of each line, with narrow and wide rectangles or shapes representing  $90^\circ$  and  $180^\circ$  pulses, respectively. Pulses filled with diagonal lines are off-resonance  $180^\circ$  Q3 shaped pulses, centered at 54 ppm. The pulse filled with hashed lines achieves selection of aspartic acid and is a  $180^\circ$  Q3 shaped pulse, centered at 42 ppm, and applied with a duration of 1200  $\mu$ s on a system operating at 11.7 T static field strength. Composite pulse decoupling of  $^1\text{H}$  and  $^{15}\text{N}$  was achieved by the use of 3.57 kHz waltz-65 and 1.25 kHz garp- sequences, respectively. Pulses labeled 'TR' are time-reversed versions of the standard  $90^\circ$  Q5 shaped pulse. All pulses are applied with x-phase unless otherwise indicated. The phase cycle is  $\phi_1 = 2(45), 2(135), 2(225), 2(315)$ ;  $\phi_2 = 8(x), 8(-x)$ ;  $\phi_3 = x, -x$ ;  $\phi_4 = 16(x), 16(-x)$ ;  $\phi_{\text{IPAP}}(\text{IP}) = x$ ,  $\phi_{\text{IPAP}}(\text{AP}) = -y$ ;  $\phi_{\text{REC}} = 2(x, -x, -x, x), 4(-x, x, x, -x), 2(x, -x, -x, x)$ . Quadrature detection in the indirect dimension is obtained by States-TPPI incrementation of  $\phi_3$ .

(HACA)CON-ALA Selective

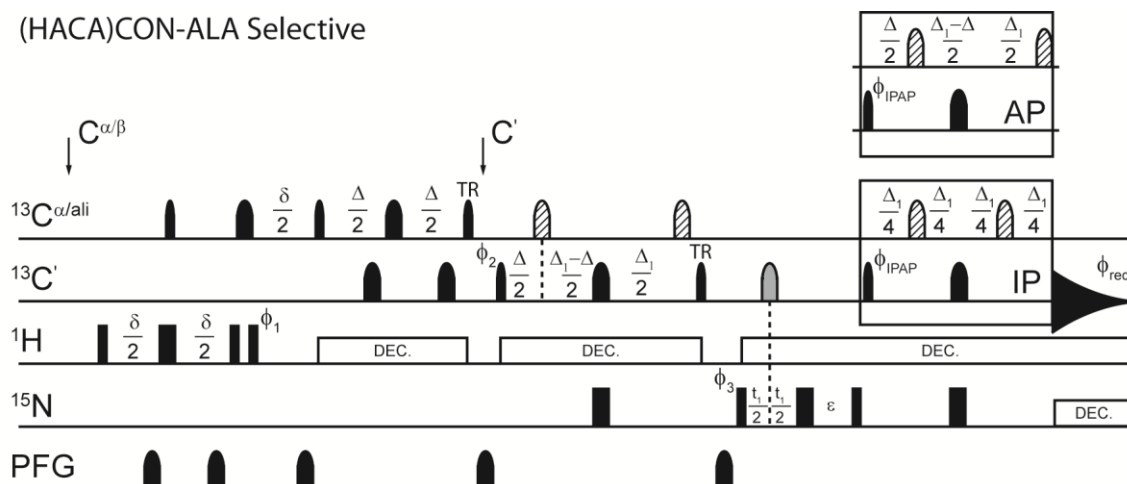

**Figure S5.** Pulse sequence for the (HACA)CON-A-IPAP experiment. The delays are  $\delta = 8.0$  ms,  $\Delta = 9.0$  ms,  $\Delta_1 = 25$  ms, and  $\epsilon = t_1(0) + \text{pC180}$ . Pulses are applied at the frequency indicated on the left of each line, with narrow and wide rectangles or shapes representing  $90^\circ$  and  $180^\circ$  pulses, respectively. The gray pulse on  $^{13}\text{C}$  indicates a band-selective  $^{13}\text{C}'$  and  $^{13}\text{C}^\alpha$  inversion pulse. Pulses filled with diagonal lines are off-resonance  $180^\circ$  Q3 shaped pulses, centered at 54 ppm. Composite pulse decoupling of  $^1\text{H}$  and  $^{15}\text{N}$  was achieved by the use of 3.57 kHz waltz-65 and 1.25 kHz garp- sequences, respectively. Pulses labeled 'TR' are time-reversed versions of the standard  $90^\circ$  Q5 shaped pulse. All pulses are applied with x-phase unless otherwise indicated. The phase cycle is  $\phi_1 = 2(30), 2(90), 2(150), 2(210), 2(270), 2(330)$ ;  $\phi_2 = 12(x), 12(-x)$ ;  $\phi_3 = x, -x$ ;  $\phi_{\text{IPAP}}(\text{IP}) = x$ ,  $\phi_{\text{IPAP}}(\text{AP}) = -y$ ;  $\phi_{\text{REC}} = 3(x, -x, -x, x), 3(-x, x, x, -x)$ . Quadrature detection in the indirect dimension is obtained by States-TPPI incrementation of  $\phi_3$ .

(HACA)NCO-ALA Selective

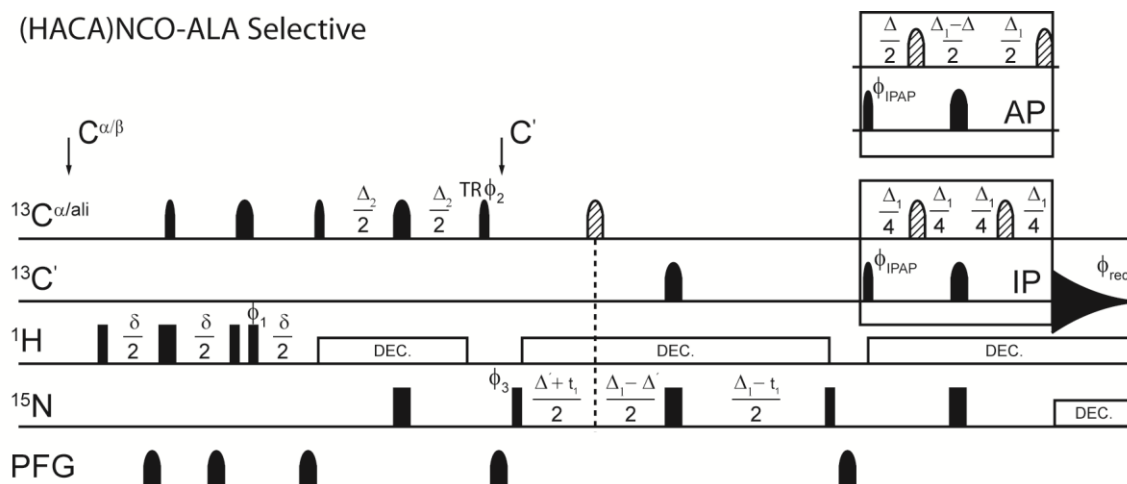

**Figure S6.** Pulse sequence for the (HACA)NCO-A-IPAP experiment. The delays are  $\delta = 8.0$  ms,  $\Delta = 9.0$  ms,  $\Delta_1 = 32$  ms,  $\Delta_2 = 15$  ms, and  $\Delta' = 26.6$  ms. Pulses are applied at the frequency indicated on the left of each line, with narrow and wide rectangles or shapes representing  $90^\circ$  and  $180^\circ$  pulses, respectively. Pulses filled with diagonal lines are off-resonance  $180^\circ$  Q3 shaped pulses, centered at 54 ppm. Composite pulse decoupling of  $^1\text{H}$  and  $^{15}\text{N}$  was achieved by the use of 3.57 kHz waltz-65 and 1.25 kHz garp- sequences, respectively. Pulses label 'TR' are time-reversed versions of the standard  $90^\circ$  Q5 shaped pulse. All pulses are applied with x-phase unless otherwise indicated. The phase cycle is  $\varphi_1 = 2(30), 2(90), 2(150), 2(210), 2(270), 2(330)$ ;  $\varphi_2 = 12(x), 12(-x)$ ;  $\varphi_3 = x, -x$ ;  $\varphi_{\text{IPAP}(\text{IP})} = x, \varphi_{\text{IPAP}(\text{AP})} = -y$ ;  $\varphi_{\text{REC}} = 3(x, -x, -x, x), 3(-x, x, x, -x)$ . Quadrature detection in the indirect dimension is obtained by States-TPPI incrementation of  $\varphi_3$ .

(HACA)CON-GLU Selective

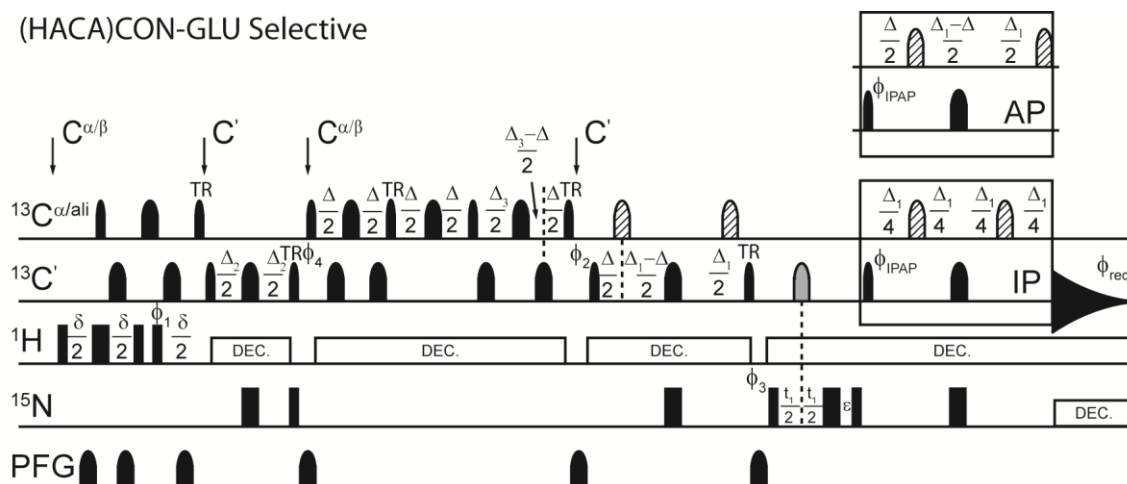

**Figure S7.** Pulse sequence for the (HACA)CON-E-IPAP experiment. The delays are  $\delta = 8.0$  ms,  $\Delta = 9.0$  ms,  $\Delta_1 = 25$  ms,  $\Delta_2 = 32$  ms,  $\Delta_3 = 18$  ms, and  $\epsilon = t_1(0) + \text{pC180}$ . Pulses are applied at the frequency indicated on the left of each line, with narrow and wide rectangles or shapes representing  $90^\circ$  and  $180^\circ$  pulses, respectively. The gray pulse on  $^{13}\text{C}$  indicates a band-selective  $^{13}\text{C}'$  and  $^{13}\text{C}^\alpha$  inversion pulse. Pulses filled with diagonal lines are off-resonance  $180^\circ$  Q3 shaped pulses, centered at 54 ppm. Composite pulse decoupling of  $^1\text{H}$  and  $^{15}\text{N}$  was achieved by the use of 3.57 kHz waltz-65 and 1.25 kHz garp- sequences, respectively. Pulses labeled 'TR' are time-reversed versions of the standard  $90^\circ$  Q5 shaped pulse. All pulses are applied with x-phase unless otherwise indicated. The phase cycle is  $\phi_1 = 2(45), 2(135), 2(225), 2(315)$ ;  $\phi_2 = 8(x), 8(-x)$ ;  $\phi_3 = x, -x$ ;  $\phi_4 = 16(x), 16(-x)$ ;  $\phi_{\text{IPAP}}(\text{IP}) = x$ ,  $\phi_{\text{IPAP}}(\text{AP}) = -y$ ;  $\phi_{\text{REC}} = 2(x, -x, -x, x), 4(-x, x, x, -x), 2(x, -x, -x, x)$ . Quadrature detection in the indirect dimension is obtained by States-TPPI incrementation of  $\phi_3$ .

(HACA)NCO-GLU Selective

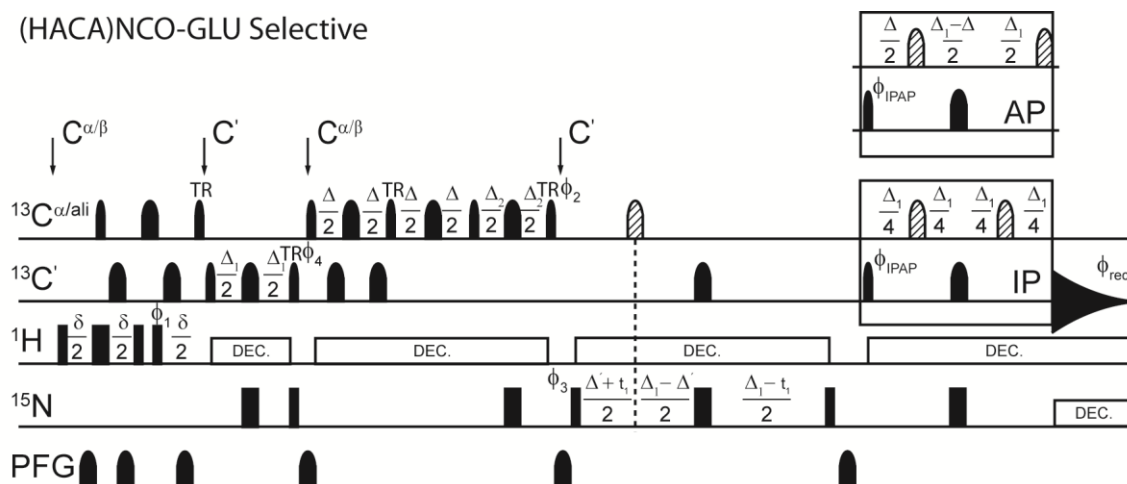

**Figure S8.** Pulse sequence for the (HACA)NCO-E-IPAP experiment. The delays are  $\delta = 8.0$  ms,  $\Delta = 9.0$  ms,  $\Delta_1 = 32$  ms,  $\Delta_2 = 18$  ms, and  $\Delta' = 26.6$  ms. Pulses are applied at the frequency indicated on the left of each line, with narrow and wide rectangles or shapes representing  $90^\circ$  and  $180^\circ$  pulses, respectively. Pulses filled with diagonal lines are off-resonance  $180^\circ$  Q3 shaped pulses, centered at 54 ppm. Composite pulse decoupling of  $^1\text{H}$  and  $^{15}\text{N}$  was achieved by the use of 3.57 kHz waltz-65 and 1.25 kHz garp- sequences, respectively. Pulses label 'TR' are time-reversed versions of the standard  $90^\circ$  Q5 shaped pulse. All pulses are applied with x-phase unless otherwise indicated. The phase cycle is  $\varphi_1 = 2(45), 2(135), 2(225), 2(315)$ ;  $\varphi_2 = 8(x), 8(-x)$ ;  $\varphi_3 = x, -x$ ;  $\varphi_4 = 16(x), 16(-x)$ ;  $\varphi_{\text{IPAP}}(\text{IP}) = x, \varphi_{\text{IPAP}}(\text{AP}) = -y$ ;  $\varphi_{\text{REC}} = 2(x, -x, -x, x), 4(-x, x, x, -x), 2(x, -x, -x, x)$ . Quadrature detection in the indirect dimension is obtained by States-TPPI incrementation of  $\varphi_3$ .





(HACA)NCO-GLY Selective

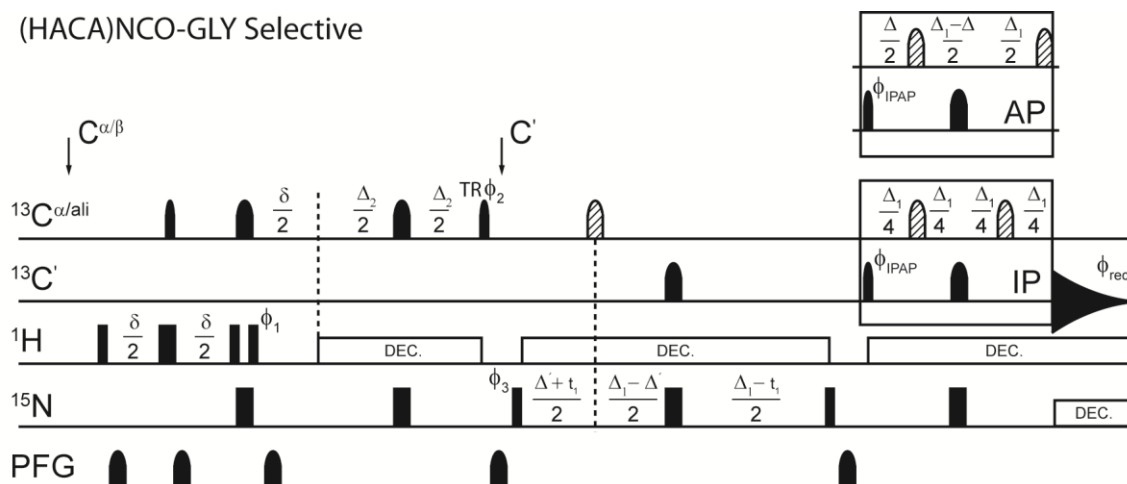

**Figure S10.** Pulse sequence for the (HACA)NCO-G-IPAP experiment. The delays are  $\delta = 8.0$  ms,  $\Delta = 9.0$  ms,  $\Delta_1 = 32$  ms,  $\Delta_2 = 14$  ms, and  $\Delta' = 26.6$  ms. Pulses are applied at the frequency indicated on the left of each line, with narrow and wide rectangles or shapes representing  $90^\circ$  and  $180^\circ$  pulses, respectively. Pulses filled with diagonal lines are off-resonance  $180^\circ$  Q3 shaped pulses, centered at 54 ppm. Composite pulse decoupling of  $^1\text{H}$  and  $^{15}\text{N}$  was achieved by the use of 3.57 kHz waltz-65 and 1.25 kHz garp- sequences, respectively. Pulses label 'TR' are time-reversed versions of the standard  $90^\circ$  Q5 shaped pulse. All pulses are applied with x-phase unless otherwise indicated. The phase cycle is  $\phi_1 = 2(45), 2(135), 2(225), 2(315)$ ;  $\phi_2 = 8(x), 8(-x)$ ;  $\phi_3 = x, -x$ ;  $\phi_{\text{IPAP}}(\text{IP}) = x$ ,  $\phi_{\text{IPAP}}(\text{AP}) = -y$ ;  $\phi_{\text{REC}} = 2(x, -x, -x, x), 2(-x, x, x, -x)$ . Quadrature detection in the indirect dimension is obtained by States-TPPI incrementation of  $\phi_3$ .

(HACA)CON-LEU/ALA Selective

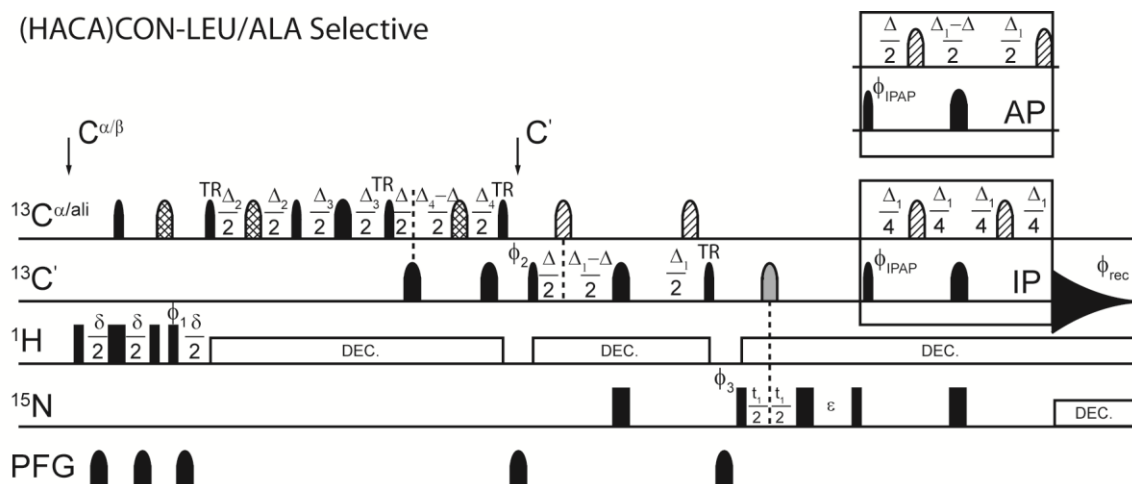

**Figure S11.** Pulse sequence for the (HACA)CON-LA-IPAP experiment. The delays are  $\delta = 8.0$  ms,  $\Delta = 9.0$  ms,  $\Delta_1 = 25$  ms,  $\Delta_2 = 7.2$  ms,  $\Delta_3 = 14$  ms,  $\Delta_4 = 18$  ms, and  $\epsilon = t_1(0) + \text{pC180}$ . Pulses are applied at the frequency indicated on the left of each line, with narrow and wide rectangles or shapes representing  $90^\circ$  and  $180^\circ$  pulses, respectively. The gray pulse on  $^{13}\text{C}$  indicates a band-selective  $^{13}\text{C}'$  and  $^{13}\text{C}^\alpha$  inversion pulse. Pulses filled with diagonal lines are off-resonance  $180^\circ$  Q3 shaped pulses, centered at 54 ppm. The pulses filled with hashed lines achieve selection of leucine and alanine. These band selective pulses are  $180^\circ$  Q3 shaped pulses with the following properties (times relevant for a system operating at 11.7 T static field strength): 1<sup>st</sup> is centered at 19 ppm and applied for 1200  $\mu\text{s}$ ; 2<sup>nd</sup> is centered at 35 ppm and applied for 840  $\mu\text{s}$ ; 3<sup>rd</sup> is centered at 48 ppm and applied for 1200  $\mu\text{s}$ . Composite pulse decoupling of  $^1\text{H}$  and  $^{15}\text{N}$  was achieved by the use of 3.57 kHz waltz-65 and 1.25 kHz garp- sequences, respectively. Pulses labeled 'TR' are time-reversed versions of the standard  $90^\circ$  Q5 shaped pulse. All pulses are applied with x-phase unless otherwise indicated. The phase cycle is  $\phi_1 = 2(30), 2(90), 2(150), 2(210), 2(270), 2(330)$ ;  $\phi_2 = 12(x), 12(-x)$ ;  $\phi_3 = x, -x$ ;  $\phi_{\text{IPAP}}(\text{IP}) = x, \phi_{\text{IPAP}}(\text{AP}) = -y$ ;  $\phi_{\text{REC}} = 3(x, -x, -x, x), 3(-x, x, x, -x)$ . Quadrature detection in the indirect dimension is obtained by States-TPPI incrementation of  $\phi_3$ .

(HACA)NCO-LEU/ALA Selective

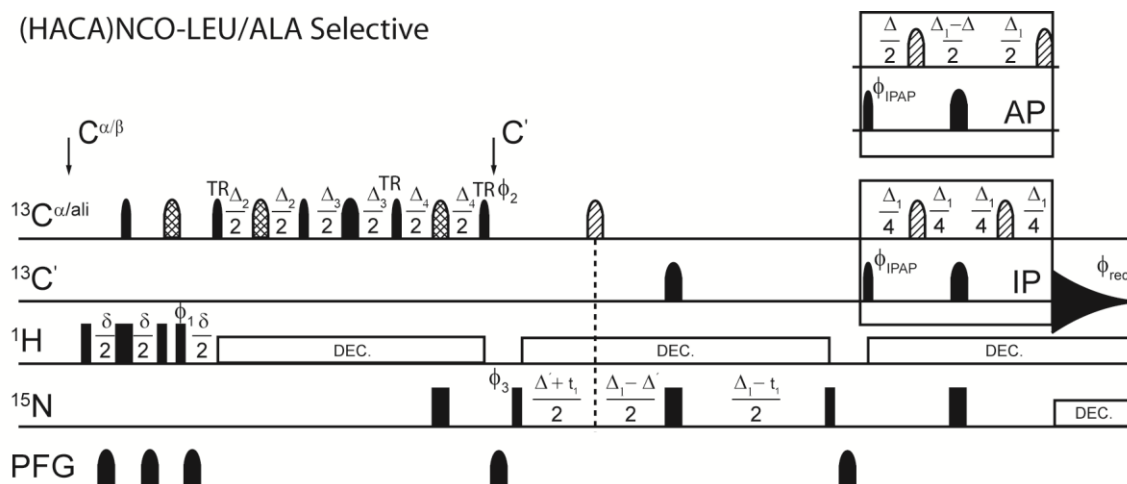

**Figure S12.** Pulse sequence for the (HACA)NCO-LA-IPAP experiment. The delays are  $\delta = 8.0$  ms,  $\Delta = 9.0$  ms,  $\Delta_1 = 32$  ms,  $\Delta_2 = 7.2$  ms,  $\Delta_3 = 14$  ms,  $\Delta_4 = 18$  ms, and  $\Delta' = 26.6$  ms. Pulses are applied at the frequency indicated on the left of each line, with narrow and wide rectangles or shapes representing  $90^\circ$  and  $180^\circ$  pulses, respectively. Pulses filled with diagonal lines are off-resonance  $180^\circ$  Q3 shaped pulses, centered at 54 ppm. The pulses filled with hashed lines achieve selection of leucine and alanine. These band selective pulses are  $180^\circ$  Q3 shaped pulses with the following properties (times relevant for a system operating at 11.7 T static field strength): 1<sup>st</sup> is centered at 19 ppm and applied for 1200  $\mu$ s; 2<sup>nd</sup> is centered at 35 ppm and applied for 840  $\mu$ s; 3<sup>rd</sup> is centered at 48 ppm and applied for 1200  $\mu$ s. Composite pulse decoupling of  $^1\text{H}$  and  $^{15}\text{N}$  was achieved by the use of 3.57 kHz waltz-65 and 1.25 kHz garp- sequences, respectively. Pulses labeled 'TR' are time-reversed versions of the standard  $90^\circ$  Q5 shaped pulse. All pulses are applied with x-phase unless otherwise indicated. The phase cycle is  $\varphi_1 = 2(30), 2(90), 2(150), 2(210), 2(270), 2(330)$ ;  $\varphi_2 = 12(x), 12(-x)$ ;  $\varphi_3 = x, -x$ ;  $\varphi_{\text{IPAP}}(\text{IP}) = x, \varphi_{\text{IPAP}}(\text{AP}) = -y$ ;  $\varphi_{\text{REC}} = 3(x, -x, -x, x), 3(x, -x)$ . Quadrature detection in the indirect dimension is obtained by States-TPPI incrementation of  $\varphi_3$ .

(HACA)CON-SER Selective

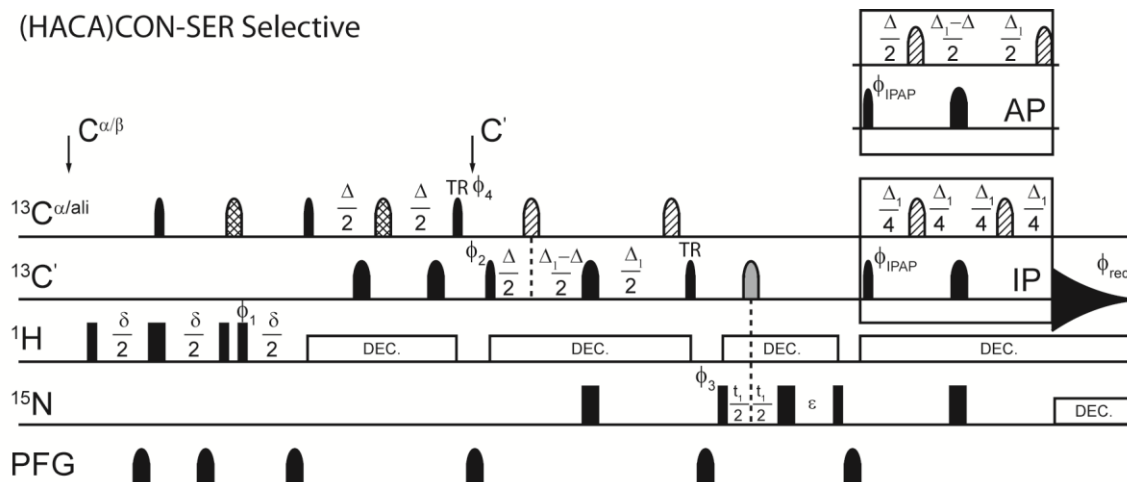

**Figure S13.** Pulse sequence for the (HACA)CON-S-IPAP experiment. The delays are  $\delta = 7.0$  ms,  $\Delta = 9.0$  ms,  $\Delta_1 = 25$  ms, and  $\epsilon = t_1(0) + \text{pC180}$ . Pulses are applied at the frequency indicated on the left of each line, with narrow and wide rectangles or shapes representing  $90^\circ$  and  $180^\circ$  pulses, respectively. The gray pulse on  $^{13}\text{C}'$  indicates a band-selective  $^{13}\text{C}'$  and  $^{13}\text{C}^\alpha$  inversion pulse. Pulses filled with diagonal lines are off-resonance  $180^\circ$  Q3 shaped pulses, centered at 54 ppm. The pulses filled with hashed lines achieve selection of serine. These band selective pulses are  $180^\circ$  Q3 shaped pulses, centered at 60 ppm and applied for 1200  $\mu\text{s}$  on a system operating at 11.7 T static field strength. Composite pulse decoupling of  $^1\text{H}$  and  $^{15}\text{N}$  was achieved by the use of 3.57 kHz waltz-65 and 1.25 kHz garp- sequences, respectively. Pulses labeled 'TR' are time-reversed versions of the standard  $90^\circ$  Q5 shaped pulse. All pulses are applied with x-phase unless otherwise indicated. The phase cycle is  $\phi_1 = 2(45), 2(135), 2(225), 2(315)$ ;  $\phi_2 = 8(x), 8(-x)$ ;  $\phi_3 = x, -x$ ;  $\phi_4 = 16(x), 16(-x)$ ;  $\phi_{\text{IPAP}}(\text{IP}) = x, \phi_{\text{IPAP}}(\text{AP}) = -y$ ;  $\phi_{\text{REC}} = 2(x, -x, -x, x), 4(-x, x, x, -x), 2(x, -x, -x, x)$ . Quadrature detection in the indirect dimension is obtained by States-TPPI incrementation of  $\phi_3$ .



(HACA)CON-TAVI Selective

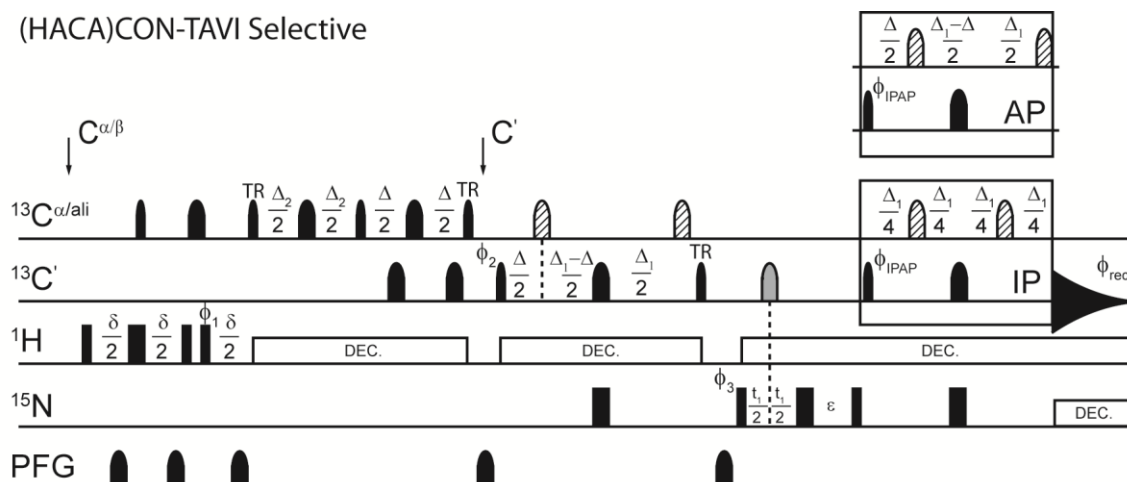

**Figure S15.** Pulse sequence for the (HACA)CON-TAVI-IPAP experiment. The delays are  $\delta = 8.0$  ms,  $\Delta = 9.0$  ms,  $\Delta_1 = 25$  ms,  $\Delta_2 = 11$  ms, and  $\epsilon = t_1(0) + \text{pC180}$ . Pulses are applied at the frequency indicated on the left of each line, with narrow and wide rectangles or shapes representing  $90^\circ$  and  $180^\circ$  pulses, respectively. The gray pulse on  $^{13}\text{C}$  indicates a band-selective  $^{13}\text{C}'$  and  $^{13}\text{C}^\alpha$  inversion pulse. Pulses filled with diagonal lines are off-resonance  $180^\circ$  Q3 shaped pulses, centered at 54 ppm. Composite pulse decoupling of  $^1\text{H}$  and  $^{15}\text{N}$  was achieved by the use of 3.57 kHz waltz-65 and 1.25 kHz garp- sequences, respectively. Pulses labeled 'TR' are time-reversed versions of the standard  $90^\circ$  Q5 shaped pulse. All pulses are applied with x-phase unless otherwise indicated. The phase cycle is  $\phi_1 = 2(30), 2(90), 2(150), 2(210), 2(270), 2(330)$ ;  $\phi_2 = 12(x), 12(-x)$ ;  $\phi_3 = x, -x$ ;  $\phi_{\text{IPAP}}(\text{IP}) = x, \phi_{\text{IPAP}}(\text{AP}) = -y$ ;  $\phi_{\text{REC}} = 3(x, -x, -x, x), 3(-x, x, x, -x)$ . Quadrature detection in the indirect dimension is obtained by States-TPPI incrementation of  $\phi_3$ .

(HACA)NCO-TAVI Selective

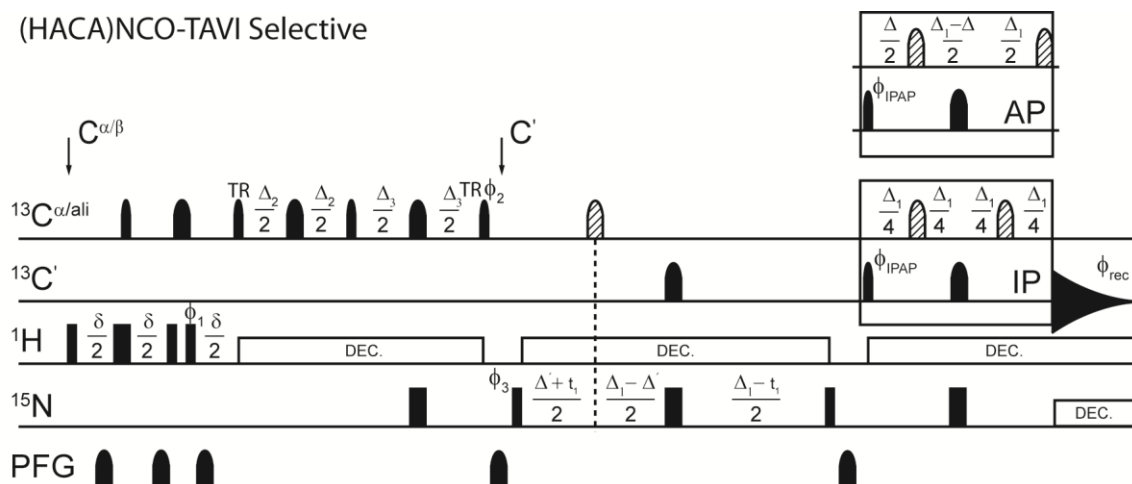

**Figure S16.** Pulse sequence for the (HACA)NCO-TAVI-IPAP experiment. The delays are  $\delta = 8.0$  ms,  $\Delta = 9.0$  ms,  $\Delta_1 = 32$  ms,  $\Delta_2 = 11$  ms,  $\Delta_3 = 15$  ms, and  $\Delta' = 26.6$  ms. Pulses are applied at the frequency indicated on the left of each line, with narrow and wide rectangles or shapes representing  $90^\circ$  and  $180^\circ$  pulses, respectively. Pulses filled with diagonal lines are off-resonance  $180^\circ$  Q3 shaped pulses, centered at 54 ppm. Composite pulse decoupling of  $^1\text{H}$  and  $^{15}\text{N}$  was achieved by the use of 3.57 kHz waltz-65 and 1.25 kHz garp- sequences, respectively. Pulses labeled 'TR' are time-reversed versions of the standard  $90^\circ$  Q5 shaped pulse. All pulses are applied with x-phase unless otherwise indicated. The phase cycle is  $\varphi_1 = 2(30), 2(90), 2(150), 2(210), 2(270), 2(330)$ ;  $\varphi_2 = 12(x), 12(-x)$ ;  $\varphi_3 = x, -x$ ;  $\varphi_{\text{IPAP}}(\text{IP}) = x$ ,  $\varphi_{\text{IPAP}}(\text{AP}) = -y$ ;  $\varphi_{\text{REC}} = 3(x, -x, -x, x), 3(-x, x, x, -x)$ . Quadrature detection in the indirect dimension is obtained by States-TPPI incrementation of  $\varphi_3$ .



(HACA)CON-THR Selective

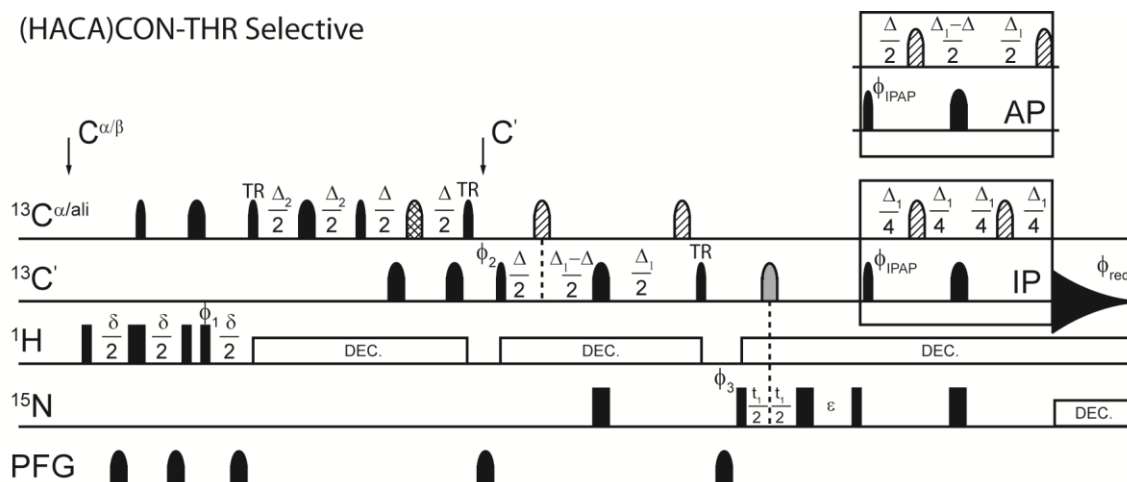

**Figure S17.** Pulse sequence for the (HACA)CON-T-IPAP experiment. The delays are  $\delta = 8.0$  ms,  $\Delta = 9.0$  ms,  $\Delta_1 = 25$  ms,  $\Delta_2 = 11$  ms, and  $\varepsilon = t_1(0) + pC180$ . Pulses are applied at the frequency indicated on the left of each line, with narrow and wide rectangles or shapes representing  $90^\circ$  and  $180^\circ$  pulses, respectively. The gray pulse on  $^{13}\text{C}$  indicates a band-selective  $^{13}\text{C}'$  and  $^{13}\text{C}^\alpha$  inversion pulse. Pulses filled with diagonal lines are off-resonance  $180^\circ$  Q3 shaped pulses, centered at 54 ppm. The pulse filled with hashed lines achieves selection of threonine. This band selective pulse is a  $180^\circ$  Q3 shaped pulse, centered at 68.5 ppm and applied for 1200  $\mu\text{s}$  on a system operating at 11.7 T static field strength. Composite pulse decoupling of  $^1\text{H}$  and  $^{15}\text{N}$  was achieved by the use of 3.57 kHz waltz-65 and 1.25 kHz garp- sequences, respectively. Pulses labeled 'TR' are time-reversed versions of the standard  $90^\circ$  Q5 shaped pulse. All pulses are applied with x-phase unless otherwise indicated. The phase cycle is  $\varphi_1 = 2(30), 2(90), 2(150), 2(210), 2(270), 2(330)$ ;  $\varphi_2 = 12(x), 12(-x)$ ;  $\varphi_3 = x, -x$ ;  $\varphi_{\text{IPAP}}(\text{IP}) = x, \varphi_{\text{IPAP}}(\text{AP}) = -y$ ;  $\varphi_{\text{REC}} = 3(x, -x, -x, x), 3(-x, x, x, -x)$ . Quadrature detection in the indirect dimension is obtained by States-TPPI incrementation of  $\varphi_3$ .

(HACA)NCO-THR Selective

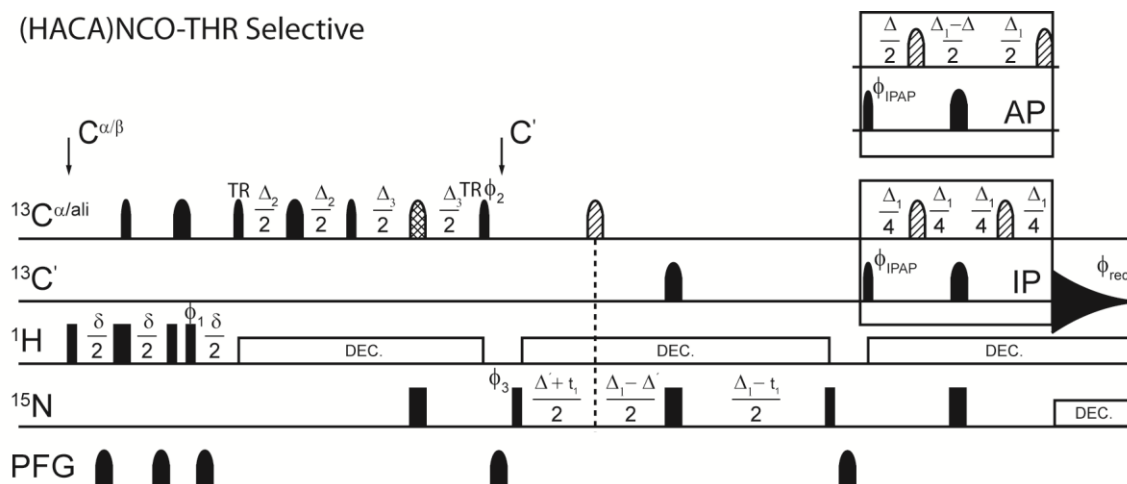

**Figure S18.** Pulse sequence for the (HACA)NCO-T-IPAP experiment. The delays are  $\delta = 8.0$  ms,  $\Delta = 9.0$  ms,  $\Delta_1 = 32$  ms,  $\Delta_2 = 11$  ms,  $\Delta_3 = 15$  ms, and  $\Delta' = 26.6$  ms. Pulses are applied at the frequency indicated on the left of each line, with narrow and wide rectangles or shapes representing  $90^\circ$  and  $180^\circ$  pulses, respectively. Pulses filled with diagonal lines are off-resonance  $180^\circ$  Q3 shaped pulses, centered at 54 ppm. The pulse filled with hashed lines achieves selection of threonine. This band selective pulse is a  $180^\circ$  Q3 shaped pulse, centered at 68.5 ppm and applied for 1200  $\mu$ s on a system operating at 11.7 T static field strength. Composite pulse decoupling of  $^1\text{H}$  and  $^{15}\text{N}$  was achieved by the use of 3.57 kHz waltz-65 and 1.25 kHz garp-sequences, respectively. Pulses labeled 'TR' are time-reversed versions of the standard  $90^\circ$  Q5 shaped pulse. All pulses are applied with x-phase unless otherwise indicated. The phase cycle is  $\phi_1 = 2(30), 2(90), 2(150), 2(210), 2(270), 2(330)$ ;  $\phi_2 = 12(x), 12(-x)$ ;  $\phi_3 = x, -x$ ;  $\phi_{\text{IPAP}}(\text{IP}) = x$ ,  $\phi_{\text{IPAP}}(\text{AP}) = -y$ ;  $\phi_{\text{REC}} = 3(x, -x, -x, x), 3(-x, x, x, -x)$ . Quadrature detection in the indirect dimension is obtained by States-TPPI incrementation of  $\phi_3$ .
